# Supplementary material
Source: PubMed Central journal article supplement (PMC2630909)
Supplement: en.2008-0368_1.pdf [file en.2008-0368_1.pdf]

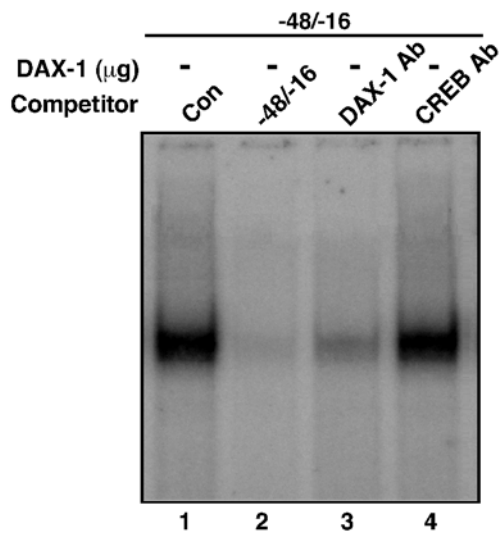

Fig. 1. Binding of the hairpin region in the StAR promoter to endogenous DAX-1 using MA-10 NE. NE (15 mg) obtained from untreated MA-10 cells was incubated with the  $^{32}\text{P}$ -labeled probe (-48/-16) encompassing the hairpin loop (lanes 1-4). The specificity of DAX-1 binding was assessed with its unlabeled sequence (lane 2), or Abs to DAX-1 (lane 3) and CREB (lane 4). Data are representative of three independent experiments.
