# Supplementary material
Source: PubMed Central journal article supplement (PMC2630909)
Supplement: en.2008-0368_2.pdf [file en.2008-0368_2.pdf]

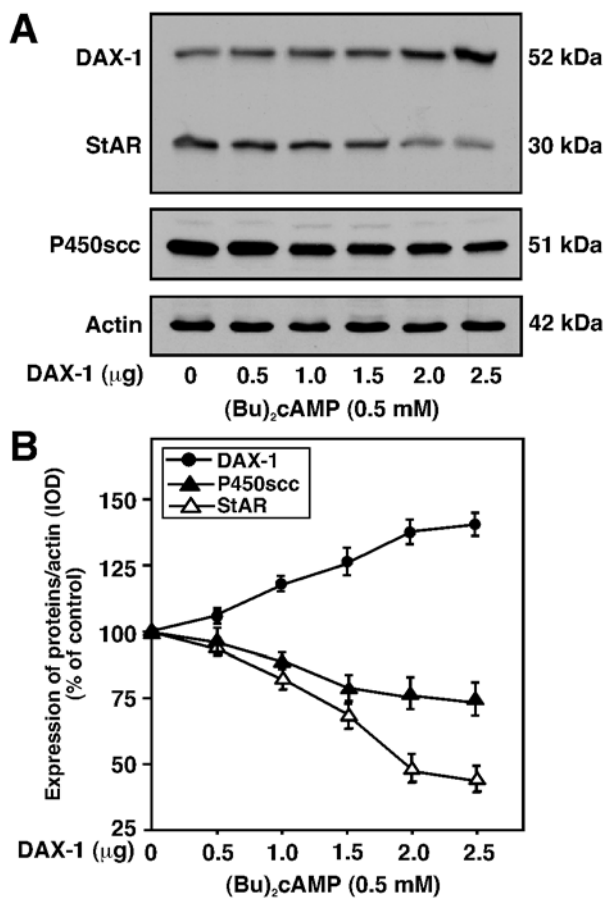

Fig. 2. The effects of overexpression of DAX-1 on StAR and P450scc expression in MA-10 cells. Cells were transfected with increasing amounts of DAX-1 expression plasmid (0-2.5 mg) as indicated. Following 36 h of transfection, cells were treated with (Bu)<sub>2</sub>cAMP (0.5 mM) for an additional 6 h, and the relative expression of DAX-1, StAR and P450scc was evaluated by immunoblotting using 25 mg of total protein (panel A). These experiments were repeated three times, and representative immunoblots illustrate the expression of DAX-1, StAR and P450scc in the different groups. Actin expression is used as a control for protein loading of the samples. Panel B illustrates the IOD values for each of the bands that were quantified and compiled from three independent experiments.
